# Supplementary material for: TET2 Mutations in Ph-Negative Myeloproliferative Neoplasms: Identification of Three Novel Mutations and Relationship with Clinical and Laboratory Findings
Source: Biomed Res Int. 2013 May 25;2013:929840. doi: 10.1155/2013/929840 (PMC3677649; doi:10.1155/2013/929840)
Supplement: Supplementary file 1 — Clinical and Laboratory data of 97 MPN's patients at diagnosis: the only differences we found in our cohort were those related to the specific subtype of MPN. No other significant differences were observed. However we found a significant prevalence of the TET2 mutation in MPN-U sub-type. Of interest 3/7 of the TET2 mutation observed were new mutation not described elsewhere [file 929840.f1.xls]

## Sheet: Data
Code	Diagnosis	Birth	TET2	Sex	Age > 67	Age 2011	Diagnosis	Date of diagnosis	Followup	BM cellularity > 50	Cellularità	Monocytic % on BM	Fibrosis	Grading of fibrosis	Ht	HB > 15.4	Hb	WBC >8420	WBC	N	L	M>440	M	Plt < 615	Plt > 615	Plt	JAK2	JAK2 > 25%	JAK2RTPCR	Prv1	EEC	CFUMK	Thrombosis	Thype of Thrombosis	Bleedings	Trattamento	Cariotype	CD34	CD34_A	Splenomegaly	Echografic Spelnomegaly	Evoluzione	TipoEvoluzione	PFS Days	OS
PE	1	1934-04-10	0	1	1	77	1	2010-06-14	407	0	0.5	not reported	no	0	55.1	1	19.2	0	1700	960	510	0	20	1	0	200	1	0	0.24	pos	0	1	1	0	0	1	1	350	0.0001	0	40	0	0	407	407
PE	3	1957-12-15	0	1	0	54	3	2008-06-09	1132	1	0.6	not reported	yes	1	45.6	1	16.1	1	12729	8210	3370	1	660	0	1	624	1	0	0.2	pos	1	0	1	0	0	0	1	7247	0.0005	1	65	1	1	972	1132
PE	1	1953-03-05	0	0	0	58	1	2010-11-22	249	1	0.7	not reported	no	0	52.5	1	17.1	1	17060	14900	1380	1	660	0	1	1745	1	1	0.4	pos	1	0	1	0	0	1	1	6850	0.0004	0	35	0	0	249	249
PE	2	1938-06-06	0	1	1	73	2	2011-01-31	180	1	0.98	not reported	yes	1	58.4	1	18.5	1	16710	12530	2340	0	200	0	1	1000	1	1	0.39	pos	1	0	0	1	0	1	1	6010	0.0015	1	70	0	0	180	180
PE	2	1934-04-20	0	0	1	77	2	2007-02-28	1590	0	0.3	not reported	no	0	48.5	0	15.4	0	8300	4540	2580	0	300	1	0	593	1	1	0.3	neg	1	0	1	0	0	1	1	3600	0.0001	0	30	0	0	1590	1590
PE	3	1946-10-30	0	1	0	65	3	2007-02-27	1594	1	0.5	not reported	yes	1	46.8	0	15.1	0	5520	4095	1600	1	890	0	1	610	0	0	0	neg	0	1	1	0	0	2	2	1459	0.00035	0	42	0	0	1594	1594
PE	2	1944-11-08	0	1	0	67	2	2005-04-06	2275	0	0.45	not reported	no	0	46.2	0	15.4	0	5920	3270	1820	0	200	1	0	494	0	0	0	neg	0	0	1	0	0	1	1	3245	0.00045	0	35	0	0	2275	2275
PE	2	1982-02-15	0	1	0	28	2	2010-11-04	267	0	0.3	not reported	no	0	44.3	0	15	0	5840	3590	1650	0	300	0	1	703	0	0	0	neg	1	0	1	0	0	0	1	1340	0.0002	0	40	0	0	267	267
PE	2	1936-07-08	0	1	1	75	2	2000-06-20	4001	0	0.4	not reported	no	0	47.3	1	15.9	1	9700	6000	1600	0	400	0	1	601	1	0	0.08	neg	0	1	1	0	0	1	1	3010	0.0003	0	35	0	0	4001	4001
PE	1	1926-10-02	0	0	1	85	1	1995-04-10	5871	1	0.9	not reported	no	0	52.6	1	19	1	11500	9670	1000	0	400	0	1	1110	1	1	0.6	pos	1	0	1	0	0	1	1	5535	0.0005	0	40	0	0	5871	5871
PE	2	1974-01-12	0	0	0	36	2	2000-01-09	4162	0	0.5	not reported	no	0	33.8	0	11.1	0	5790	3490	1400	0	400	1	0	453	1	0	0.24	pos	1	0	0	1	0	0	1	61030	0.0003	1	100	0	0	4162	4162
PE	3	1944-07-24	0	1	0	67	3	2009-12-02	599	1	0.9	not reported	yes	1	50.6	1	17.4	0	7430	6300	1000	0	80	1	0	429	1	1	0.64	pos	1	0	0	1	0	1	1	2972	0.0004	1	47	0	0	599	599
PE	2	1960-07-26	0	1	0	51	2	2005-08-24	2137	0	0.5	not reported	no	0	50.3	1	16.7	1	12870	8500	3200	0	220	0	1	608	1	0	0.2	pos	1	0	1	0	0	2	1	2463	0.0003	0	35	0	0	2137	2137
PE	1	1928-08-04	0	1	1	83	1	2010-05-19	432	1	0.7	not reported	yes	1	53.3	1	17.7	1	14900	12300	2000	0	400	0	1	771	1	1	0.368	pos	1	0	1	0	0	1	1	12100	0.0006	1	70	0	0	432	432
PE	2	1937-07-02	0	1	1	74	2	2009-01-15	916	0	0.3	not reported	no	0	41.1	0	13.1	0	6440	3000	1500	0	300	0	1	606	1	0	0.14	neg	1	0	0	1	0	1	1	2576	0.0004	0	36	0	0	916	916
PE	1	1938-11-29	0	1	1	73	1	2007-11-28	1323	1	0.8	not reported	yes	1	51.6	1	17	1	10410	7620	1580	0	500	1	0	394	1	1	0.6	pos	1	1	0	1	0	1	1	6129	0.0006	1	70	0	0	1323	1323
PE	2	1982-01-26	0	0	0	28	2	2004-09-24	2467	1	0.65	not reported	yes	2	41.6	0	13.8	1	9010	6810	1520	0	600	0	1	1002	0	0	0	neg	0	1	1	0	0	0	1	16147	0.0016	1	60	1	1	1276	2467
PE	3	1929-08-23	0	1	1	82	3	2007-12-07	1314	0	0.4	not reported	yes	1	42.3	0	14.3	1	13820	10990	1940	0	300	0	1	1094	1	1	0.45	pos	1	0	0	1	0	1	1	3958	0.00035	0	35	0	0	1314	1314
PE	1	1945-09-24	1	1	0	66	1	2007-09-03	1408	1	0.75	not reported	no	0	62.2	1	19.9	1	12380	7640	2960	1	1150	1	0	398	1	1	0.65	pos	1	1	0	1	0	1	1	27300	0.0035	0	32	1	2	1408	1408
PE	2	1955-10-10	0	1	0	56	2	2008-06-10	1131	1	0.65	not reported	yes	1	46.9	0	16.1	0	6520	4000	1290	0	400	1	0	443	1	0	0.1	pos	1	0	1	0	0	0	1	6520	0.0005	1	72	0	0	1131	1131
PE	1	1940-02-23	1	1	1	71	1	2000-10-01	3900	1	0.8	not reported	yes	1	51.1	0	17	0	6280	4200	2000	0	300	1	0	134	1	1	0.4	pos	0	1	0	1	0	1	1	3742	0.0002	1	105	0	0	3900	3900
PE	2	1968-07-21	0	0	0	43	2	2007-04-02	1559	0	0.5	not reported	no	0	46	0	15.1	0	7460	5028	2000	1	600	0	1	827	1	1	0.45	pos	1	0	1	0	0	2	1	5560	0.0006	1	55	0	0	1559	1559
PE	2	1935-09-06	1	0	1	76	2	2009-09-09	682	0	0.3	not reported	no	0	47.3	1	15.7	1	11190	7490	2690	1	600	0	1	849	0	0	0	neg	0	1	1	0	0	1	1	1030	0.0003	0	31	0	0	682	682
PE	5	1964-03-22	0	1	0	47	5	2010-05-03	448	0	0.4	not reported	no	0	50.3	1	17.3	1	15530	11160	2940	1	820	0	1	778	1	1	0.31	pos	1	0	1	0	0	1	2	2278	0.0002	1	62	0	0	448	448
PE	2	1928-04-01	0	1	1	83	2	2004-11-17	2414	0	0.45	not reported	yes	1	50	1	16.8	0	7690	4200	2000	1	600	1	0	569	0	0	0	pos	1	0	0	1	0	1	1	5600	0.0005	0	38.5	0	0	2414	2414
PE	2	1930-08-19	0	1	1	81	2	1998-07-03	4708	1	0.85	not reported	yes	1	42.2	0	14.3	0	4600	3500	2684	1	500	1	0	466	1	1	0.4	pos	1	1	1	0	0	1	1	1900	0.0005	1	50	0	0	4708	4708
PE	2	1940-02-05	0	1	1	71	2	2005-10-24	2077	0	0.5	not reported	no	0	44.1	0	15.2	0	7990	5990	#NULL!	1	480	0	1	696	1	0	0.2	neg	1	1	1	0	0	1	1	1422	0.00025	0	38	0	0	2077	2077
PE	2	1975-08-11	0	0	0	35	2	2005-05-12	2239	1	0.7	not reported	no	0	41.1	0	14.8	0	6300	3969	1386	1	450	0	1	1041	0	0	0	neg	0	1	1	0	0	0	1	1979	0.0004	0	40	0	0	2239	2239
PE	2	1948-02-11	0	1	0	63	2	2003-08-21	2860	0	0.5	not reported	no	0	49.3	0	14.5	1	10280	5410	3700	1	500	0	1	661	0	0	0	neg	0	1	1	0	0	1	1	1790	0.00025	0	42.8	0	0	2860	2860
PE	2	1967-01-23	0	0	0	44	2	2005-06-20	2201	0	0.4	not reported	no	0	47.5	1	16	1	13000	10000	1310	1	700	0	1	963	1	1	0.59	pos	1	0	1	0	0	0	1	2149	0.0002	1	51	0	0	2201	2201
PE	1	1935-12-17	0	0	1	76	1	2007-09-17	1394	1	0.6	not reported	no	0	55.6	1	18.5	1	12900	9800	2400	1	900	1	0	555	1	1	0.5	pos	1	0	0	1	0	1	2	2099	0.00035	0	38	0	0	1394	1394
PE	1	1930-06-03	0	1	1	81	1	2000-07-10	3981	1	0.9	not reported	no	0	57.8	1	18.3	1	13720	11000	2000	1	500	1	0	166	1	1	0.8	pos	0	1	0	1	0	1	1	4015	0.00015	0	45	1	1	3650	3981
PE	1	1931-04-30	0	1	1	80	1	2010-03-16	495	1	0.7	not reported	no	0	51.4	1	17.8	1	14430	11410	1439	0	400	1	0	463	1	1	0.61	pos	1	1	1	0	0	1	1	5100	0.0005	1	62	0	0	495	495
PE	2	1960-03-06	0	1	0	51	2	2005-03-09	2302	0	0.5	not reported	yes	1	49.3	1	16.3	1	12780	7690	3440	0	400	0	1	1361	0	0	0	neg	1	0	1	0	0	1	1	1116	1.5e-05	1	65	0	0	2302	2302
PE	2	1936-03-04	0	0	1	75	2	2007-07-12	1459	0	0.3	not reported	no	0	40.3	0	13	0	6640	4100	2100	1	500	1	0	545	1	0	0.14	pos	1	0	1	0	0	1	1	3180	0.00035	0	40	0	0	1459	1459
PE	5	1944-03-11	0	0	0	67	5	2008-09-09	1042	0	0.2	not reported	no	0	37.9	0	12.6	0	7400	3600	2000	0	300	0	1	1006	0	0	0	neg	0	1	1	0	0	1	1	1617	0.00025	0	37	1	1	1042	1042
PE	5	1939-03-23	1	0	1	72	5	2010-06-24	397	0	0.5	5% clonal	yes	1	48.1	1	16.1	0	7740	5070	1990	0	300	1	0	476	1	0	0.24	pos	1	1	1	0	0	1	1	5090	0.0009	0	40	0	0	397	397
PE	5	1934-09-05	0	1	1	77	5	2010-02-25	516	0	0.25	not reported	no	0	38.4	0	12.5	0	7720	#NULL!	#NULL!	0	400	0	1	717	0	0	0	neg	1	0	1	0	0	1	1	2586	0.0005	0	45	0	0	516	516
PE	1	1935-10-02	0	1	1	76	1	2009-07-15	736	1	0.95	not reported	no	0	50.1	1	15.8	1	11560	8880	2260	1	460	1	0	325	1	1	0.65	pos	1	0	0	1	0	1	1	12500	0.0002	1	70	0	0	736	736
PE	5	1940-04-10	1	1	1	71	5	2008-05-14	1157	0	0.4	3% clonal	yes	1	52.5	1	17.1	0	6600	#NULL!	#NULL!	1	490	1	0	181	1	0	0.08	pos	0	1	1	0	0	1	1	1825	0.00025	1	65	0	0	1157	1157
PE	3	1943-05-26	0	1	1	68	3	2010-08-11	350	0	0.4	not reported	yes	1	43.7	0	13.4	1	12200	9940	1500	1	480	0	1	861	1	1	0.42	pos	1	1	1	0	0	1	1	1300	0.0005	1	58	0	0	350	350
PE	2	1955-05-20	0	0	0	56	2	2005-11-14	2057	1	0.8	not reported	no	0	42.7	0	13.7	1	12000	8000	2400	1	600	1	0	568	1	0	0.25	pos	1	0	0	1	0	1	1	934	0.00015	1	90	0	0	2057	2057
PE	2	1944-02-27	0	0	1	67	2	2007-09-04	1407	0	0.25	not reported	no	0	40.7	0	12.7	1	8800	5300	2530	0	200	0	1	893	1	1	0.22	pos	1	1	1	0	0	2	1	4400	0.00065	0	30	0	0	1407	1407
PE	2	1972-11-06	0	1	0	39	2	2005-01-20	2351	1	0.6	not reported	yes	1	46.6	1	15.6	0	6410	4430	1240	0	340	1	0	498	0	0	0	neg	0	1	1	0	0	0	1	2442	0.00025	1	74	0	0	2351	2351
PE	1	1947-02-12	0	0	0	64	1	2002-02-01	3067	1	0.6	not reported	no	0	53.3	1	18	1	12200	9000	2000	1	600	1	0	489	1	1	0.9	pos	1	0	0	1	1	1	1	4460	0.0004	1	80	0	0	3067	3067
PE	2	1946-01-31	0	0	0	65	2	2004-12-16	2385	0	0.25	not reported	no	0	44.4	0	14.6	0	6330	3940	1790	1	450	0	1	781	1	0	0.08	neg	1	0	1	0	0	1	1	349	0.0001	0	28	0	0	2385	2385
PE	2	1942-07-07	0	0	1	69	2	2008-11-05	986	0	30-35%	not reported	no	0	45.8	0	15.2	0	8350	6000	2100	1	490	1	0	462	0	0	0	neg	0	1	1	0	0	1	1	1104	0.0002	1	50	0	0	986	986
PE	2	1946-05-07	0	0	0	65	2	2010-03-15	496	0	0.3	not reported	yes	1	40.4	0	13.3	1	10300	7600	2030	1	500	0	1	1599	1	0	0.226	pos	1	0	1	0	0	1	1	1000	0.0003	0	30	0	0	496	496
PE	2	1940-05-18	0	1	1	71	2	2011-02-02	179	0	0.4	not reported	no	0	47.7	1	16	0	8420	5850	1900	1	500	1	0	450	0	0	0	neg	1	1	1	0	0	1	1	3750	0.0002	1	66	0	0	179	179
PE	3	1934-02-09	0	1	1	77	3	2008-08-08	1073	1	0.6	not reported	yes	1	46.5	0	15.1	0	7040	5820	610	1	600	1	0	477	1	1	0.4	pos	1	1	0	1	0	1	1	11240	0.0016	1	50	0	0	1073	1073
PE	2	1960-02-06	0	1	0	51	2	2009-11-13	618	0	0.45	not reported	no	0	43.6	0	14.1	0	6100	3690	1990	0	290	0	1	1415	0	0	0	neg	0	1	1	0	0	1	1	850	0.0001	0	38	0	0	618	618
PE	2	1974-09-19	0	0	0	36	2	2003-01-21	3070	0	0.5	not reported	no	0	40.2	0	12.9	1	9470	7090	1740	1	680	0	1	998	0	0	0	neg	1	0	1	0	2	3	1	6555	0.0004	0	38	0	0	3070	3070
PE	2	1946-05-07	0	1	0	65	2	2010-07-01	390	0	0.5	not reported	no	0	50.6	1	17	1	10500	7060	2750	1	430	1	0	565	1	1	0.4	pos	1	0	1	0	0	1	1	1000	0.0003	0	30	0	0	390	390
PE	1	1956-03-13	0	1	0	55	1	1999-05-24	4387	1	0.8	not reported	no	0	53	1	19	0	7300	5000	1780	0	200	1	0	534	1	1	0.6	pos	1	0	1	0	0	3	2	50390	0.0056	1	95	1	1	4387	4387
PE	2	1964-02-27	0	0	0	47	2	2005-05-05	2246	0	0.4	not reported	no	0	46	0	15	0	6950	4300	2200	0	350	0	1	693	1	0	0.1	neg	1	0	1	0	0	0	1	9292	0.0013	0	42	0	0	2246	2246
PE	2	1982-09-12	0	1	0	28	2	2009-03-03	868	0	0.45	not reported	yes	1	47.7	1	16.4	0	7700	5000	2000	1	400	1	0	590	1	1	0.4	pos	1	0	1	0	0	0	1	1560	0.0001	0	40	0	0	868	868
PE	5	1941-03-05	0	0	1	70	5	2009-01-20	911	0	0.2	not reported	no	0	56.7	1	19.1	1	9820	7700	1280	0	400	0	1	701	1	1	0.4	pos	1	0	1	0	0	1	2	463	0.0001	0	42	0	0	911	911
PE	2	1935-06-10	0	1	1	76	2	2003-09-09	2842	0	0.45	not reported	no	0	43.2	0	13.7	1	12610	8910	2060	0	400	0	1	695	1	1	0.45	neg	1	0	1	0	0	1	1	1158	0.00015	0	38	0	0	2842	2842
PE	2	1946-05-26	0	0	0	65	2	2004-02-12	2689	1	0.7	not reported	no	0	51.5	1	17.1	1	10860	7550	2230	1	780	0	1	786	1	1	0.45	pos	1	0	0	1	0	1	1	601	0.0001	0	28	0	0	2689	2689
PE	2	1943-12-18	0	0	1	68	2	2008-12-03	958	0	0.4	not reported	no	0	44.1	0	14.6	1	10530	6400	3660	1	410	1	0	522	1	1	0.35	pos	1	0	0	1	0	1	1	145	0.0002	0	28	0	0	958	958
PE	1	1933-04-02	0	1	1	78	1	2006-12-23	1658	1	0.8	not reported	yes	1	60.5	1	19	1	19600	14300	1430	1	430	1	0	492	1	1	0.55	pos	1	1	1	0	0	1	1	3870	0.0002	1	80	0	0	1658	1658
PE	1	1935-03-21	0	0	1	76	1	2011-03-23	128	1	0.9	not reported	no	0	51.7	0	16	1	11580	9420	1440	1	450	0	1	746	1	1	0.64	pos	1	0	1	0	0	1	1	2565	0.0005	1	50	0	0	128	128
PE	5	1943-09-26	1	0	1	68	5	2009-03-11	860	1	0.6	0.07	yes	1	46.5	0	16.1	0	5400	4400	800	0	300	1	0	558	1	1	0.4	pos	1	1	1	0	0	1	1	1249	0.0005	0	40	0	0	860	860
PE	1	1948-12-19	0	1	0	63	1	2001-07-01	3630	1	0.8	not reported	no	0	50.4	0	16.4	0	4670	3200	1200	0	300	1	0	209	1	1	0.6	pos	1	1	1	0	0	1	1	4450	0.0004	1	50	0	0	3630	3630
PE	1	1981-04-10	0	1	0	30	1	2008-08-05	1076	1	0.8	not reported	no	0	47.5	1	15.3	0	7080	5670	1100	1	500	1	0	471	1	0	0.24	neg	1	0	0	1	0	1	1	1954	0.0004	1	200	0	0	1076	1076
PE	2	1958-10-30	0	0	0	53	2	2006-11-02	1709	0	0.5	not reported	no	0	41.7	1	14.2	0	6900	4000	2000	0	380	1	0	574	1	0	0.08	neg	1	0	1	0	0	0	1	4200	0.0008	0	43	0	0	1709	1709
PE	1	1927-11-04	0	1	1	84	1	2010-12-06	235	1	0.9	not reported	yes	1	60	0	20.3	1	9540	7750	1110	0	380	1	0	432	1	0	0.25	pos	1	0	1	0	0	1	1	5500	0.0005	1	64	0	0	235	235
PE	2	1922-02-12	0	0	1	89	2	2008-02-05	1256	1	0.6	not reported	no	0	41.8	1	13.8	0	6880	4400	1100	0	200	0	1	958	1	1	0.3	neg	1	0	1	0	0	1	1	407	0.0001	0	34	0	0	1256	1256
PE	2	1952-01-05	0	0	0	59	2	2009-01-28	903	0	0.3	not reported	no	0	45.5	0	15.2	0	6690	4050	1610	1	600	0	1	636	1	1	0.3	pos	0	1	1	0	0	0	1	4014	0.0006	0	40	0	0	903	903
PE	3	1929-09-24	0	1	1	82	3	2005-04-24	2257	1	0.7	not reported	yes	2	43.4	0	15.2	1	10000	7800	2000	0	400	0	1	615	1	1	0.6	pos	1	1	1	0	0	1	1	5090	0.0005	1	50	0	3	2061	2257
PE	2	1975-02-02	0	0	0	35	2	2004-05-03	2608	0	0.5	not reported	no	0	44.8	0	15.2	0	6490	4430	1360	1	450	0	1	663	1	1	0.393	pos	1	0	1	0	0	0	1	6565	0.0009	0	40	0	0	2608	2608
PE	1	1942-01-28	0	0	1	69	1	2010-11-08	263	1	0.7	not reported	yes	1	57.1	1	19.5	0	8590	6480	1340	1	470	1	0	473	1	1	0.412	pos	1	0	1	0	0	1	1	480	0.0001	1	71	0	0	263	263
PE	1	1946-03-03	0	0	0	65	1	2010-09-16	315	1	0.6	not reported	no	0	54.9	1	18	1	11320	7770	2710	1	540	1	0	493	1	0	0.28	neg	1	0	1	0	0	1	1	860	0.0001	0	25	0	0	315	315
PE	1	1944-06-01	0	1	0	67	1	2011-01-20	191	1	0.7	not reported	no	0	62.2	1	19.9	0	7560	5980	1010	0	370	1	0	149	1	1	79.4%	pos	1	0	0	1	0	1	1	3089	0.0004	1	72	0	0	191	191
PE	1	1950-06-12	0	1	0	61	1	2002-07-08	3263	1	0.7	not reported	no	0	63.4	1	21.5	0	6230	4230	1310	1	450	1	0	173	1	1	0.5	pos	1	0	1	0	0	1	1	4450	0.0002	1	64	0	0	3263	3263
PE	5	1968-10-22	0	0	0	43	5	2005-08-30	2130	1	0.8	not reported	no	0	42.3	0	13.5	1	8670	6310	1560	1	430	1	0	507	1	0	0.1	neg	1	0	1	0	0	0	1	3560	0.00035	1	52	0	0	2130	2130
PE	1	1930-04-19	0	1	1	81	1	2004-05-10	2601	1	0.8	not reported	no	0	51	1	18.5	1	15000	9000	1500	1	440	1	0	562	1	1	0.8	pos	1	1	0	1	0	1	1	1510	0.00015	0	38	0	0	2601	2601
PE	2	1960-12-18	0	0	0	51	2	2004-02-17	2684	1	0.85	not reported	no	0	51.8	1	16.8	1	10020	6540	2200	1	560	0	1	715	1	0	0.35	pos	1	0	0	1	0	1	1	5336	0.0008	0	105	1	1	2684	2684
PE	2	1950-07-26	0	1	0	61	2	2010-01-21	550	0	0.2	not reported	yes	1	43.3	0	15.2	0	5750	3500	1100	1	500	0	1	764	0	0	0	pos	1	0	1	0	0	1	1	349	0.0001	0	48	0	0	550	550
PE	2	1950-10-20	0	0	0	61	2	2004-05-20	2591	0	0.3	not reported	yes	1	43.6	0	14.7	0	8360	5540	1640	1	770	0	1	607	1	0	0.23	pos	1	0	0	1	0	1	1	1034	0.0002	0	40	0	0	2591	2591
PE	3	1940-07-09	0	1	1	71	3	2004-01-24	2707	1	0.7	not reported	yes	2	35.9	0	12.1	0	6570	4740	1070	1	700	1	0	548	0	0	0	neg	0	1	1	0	0	1	1	24545	0.0045	1	102	0	0	2707	2707
PE	2	1949-02-08	0	1	0	62	2	2000-01-01	4170	1	0.6	not reported	no	0	46.1	0	15	1	8530	6420	1460	0	200	0	1	673	0	0	0	neg	1	1	1	0	0	1	1	8810	0.00095	1	83	0	0	4170	4170
PE	2	1948-09-12	0	1	0	63	2	2005-06-23	2198	0	0.5	not reported	no	0	42.2	0	14.9	1	8660	6450	1400	0	400	0	1	684	0	0	0	neg	0	1	1	0	1	1	1	1680	0.0004	0	39	0	0	2198	2198
PE	1	1929-03-06	0	0	1	82	1	2005-07-21	2170	1	0.9	not reported	yes	1	50.1	0	15.4	1	10630	7420	2080	1	600	0	1	649	1	1	0.6	pos	1	0	1	0	0	1	1	1914	0.0001	0	40	0	0	2170	2170
PE	2	1934-07-11	0	0	1	77	2	2007-03-29	1562	0	0.25	not reported	yes	1	40.5	0	13.4	0	7530	4200	2100	1	500	0	1	966	1	0	0.33	neg	1	0	0	1	0	1	1	1267	0.00025	1	48	0	0	1562	1562
PE	2	1923-12-29	0	1	1	88	2	2005-03-15	2296	1	0.6	not reported	yes	1	45	0	14.6	0	5830	3190	1730	1	500	0	1	609	1	1	0.4	pos	0	0	0	1	0	1	1	872	0.0002	0	36	0	0	2296	2296
PE	2	1954-07-20	0	1	0	57	2	2009-04-23	818	0	0.5	not reported	no	0	49.5	1	16.5	1	10320	7420	2080	1	520	0	1	694	1	1	0.3	pos	1	0	1	0	0	0	3	3096	0.0003	1	85	0	0	818	818
PE	3	1956-06-28	0	0	0	55	3	2006-06-07	1854	0	0.3	not reported	no	0	43.2	0	14.4	0	7030	5140	1430	0	330	0	1	849	0	0	0	neg	0	1	1	0	2	0	1	5324	0.0011	0	26	0	0	1267	1854
PE	2	1938-05-08	0	1	1	73	2	2005-01-01	2370	0	0.2	not reported	no	0	36.8	0	12.4	0	3180	1610	860	0	400	0	1	914	0	0	0	neg	0	1	0	1	0	1	1	6900	0.00185	0	65	0	0	2370	2370
PE	2	1943-02-26	0	0	0	68	2	2003-05-20	2951	1	0.6	not reported	no	0	47.3	0	15.5	1	9900	7690	1590	1	600	0	1	623	1	0	0.2	pos	1	1	0	1	0	1	1	849	0.00015	0	40	0	0	2951	2951
PE	2	1975-03-05	0	0	0	35	2	2002-05-12	3319	0	0.5	not reported	no	0	37.9	0	12.5	0	5540	3140	1890	0	380	0	1	1750	0	0	0	neg	1	0	1	0	0	1	1	2362	0.00035	0	40	0	0	3319	3319
PE	1	1953-01-29	0	1	0	58	1	2004-10-26	2435	1	0.9	not reported	no	0	54.4	1	17.5	0	7900	5050	2600	0	300	0	1	634	1	1	0.29	pos	1	1	0	1	0	1	4	2728	0.0004	0	42	0	0	2435	2435
PE	2	1957-07-18	0	0	0	54	2	2001-05-29	3662	0	0.4	not reported	yes	1	38.6	0	14.3	1	9220	4440	3890	0	400	0	1	1500	0	0	0	neg	0	1	1	0	0	1	1	13796	0.0027	0	30	1	1	2796	3662
PE	2	1945-12-12	0	0	0	66	2	2004-09-22	2469	0	0.45	not reported	no	0	44	0	14.6	1	9870	7720	1210	1	500	0	1	639	1	0	0.15	pos	1	0	0	1	0	1	1	3740	0.0002	0	40	0	0	2469	2469
PE	2	1985-08-28	0	0	0	25	2	2009-09-16	675	0	0.5	not reported	no	0	43.9	0	14.7	0	6800	5000	1400	0	400	0	1	1022	0	0	0	neg	1	0	1	0	0	1	1	1360	0.0002	0	35	0	0	675	675
PE	2	1968-03-29	1	1	0	43	2	2007-10-09	1372	0	0.5	not reported	no	0	41	0	13.3	0	6860	4000	2070	0	110	1	0	522	1	0	0.02	neg	1	0	0	1	0	1	1	2139	0.0003	0	35	0	0	1372	1372
PE	2	1934-03-12	0	0	1	77	2	2010-02-01	540	0	20-25%	not reported	no	0	34.6	0	14.6	1	10460	7300	2500	1	600	1	1	822	1	0	0.09	pos	1	1	1	0	0	1	1	3100	0.0003	0	40	0	0	540	540

## Sheet: Legends
Diagnosis	Thrombosis	Bleedingsi	Cariotype
1=PV	IHS=1	Spontaneous=1	1=norma
2=TE	PVT=2	Secondary=2	2=1 anomaly
3=IMF	BCS=3		3=complex
5=MPN-U	TIA=4		4=trisomy
	DVT=5
